# Supplementary figures and images for: Empirical evidence that disease prevalence may affect the performance of diagnostic tests with an implicit threshold: a cross-sectional study
Source: PubMed Central journal article supplement — BMJ Open. 2012 Feb 3;2(1):e000746. doi: 10.1136/bmjopen-2011-000746 (PMC3274715; doi:10.1136/bmjopen-2011-000746), 2012-02-03

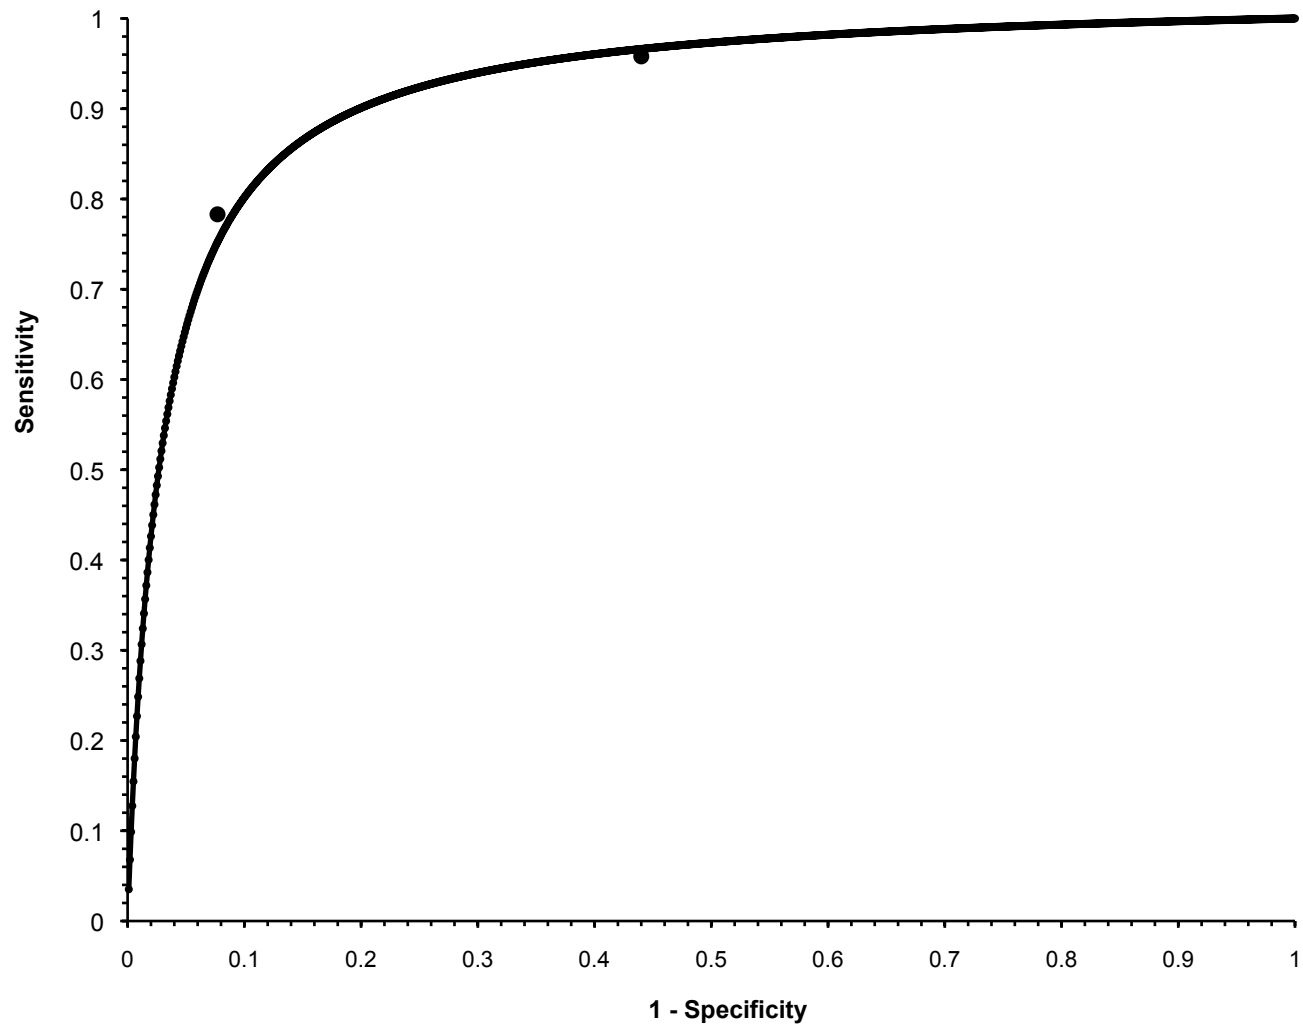

Supplement: bmjopen-2011-000746-s3.pdf [file bmjopen-2011-000746-s3.pdf]

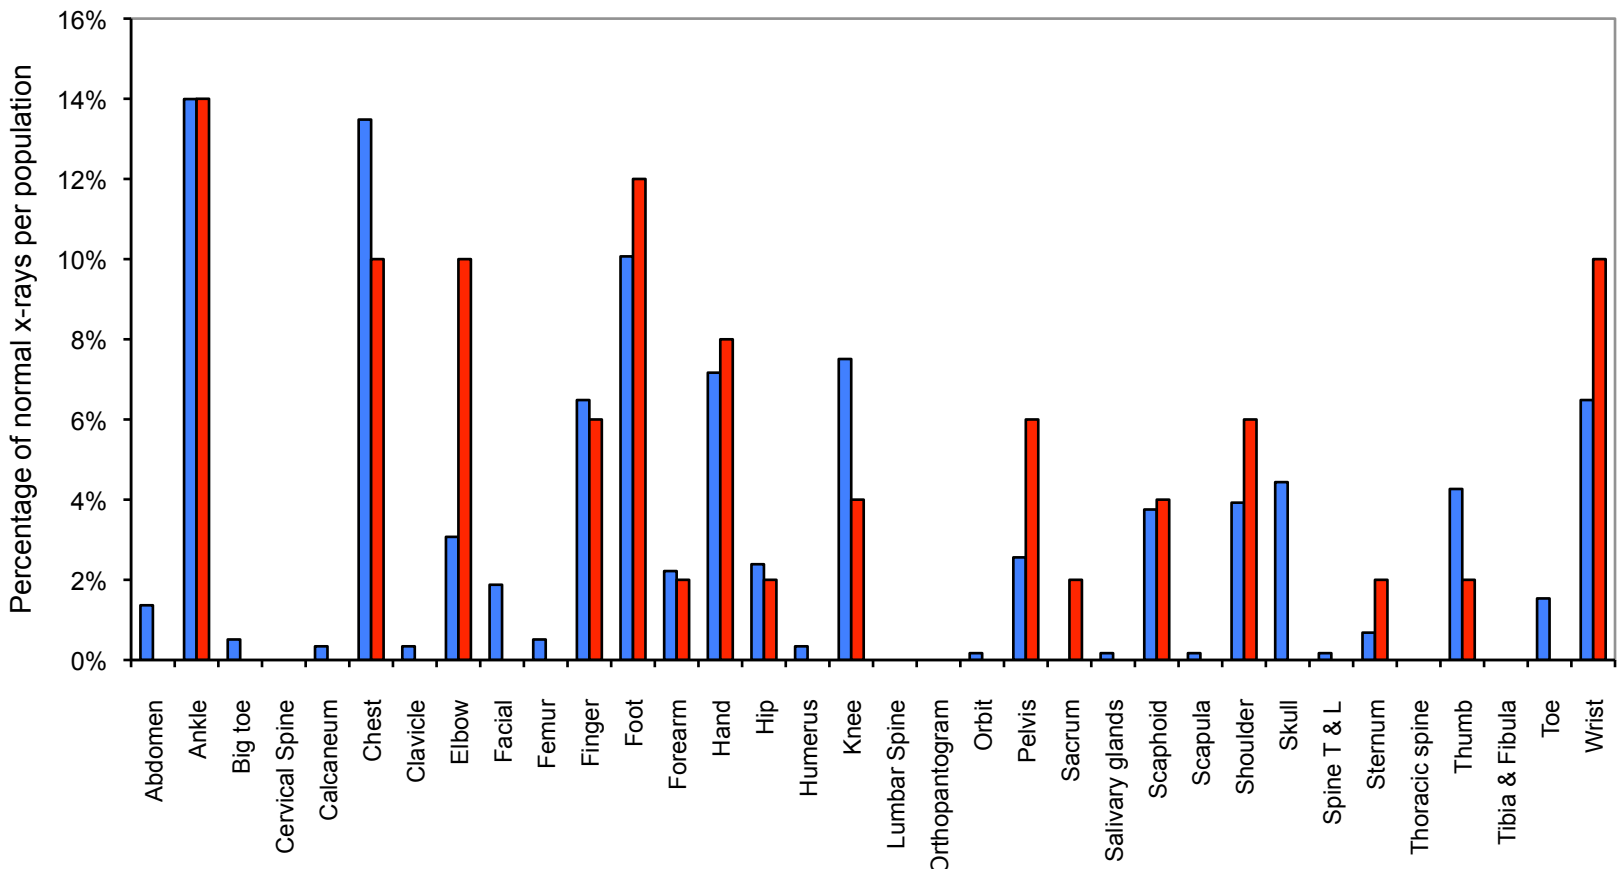

Supplement: bmjopen-2011-000746-s4.pdf [file bmjopen-2011-000746-s4.pdf]

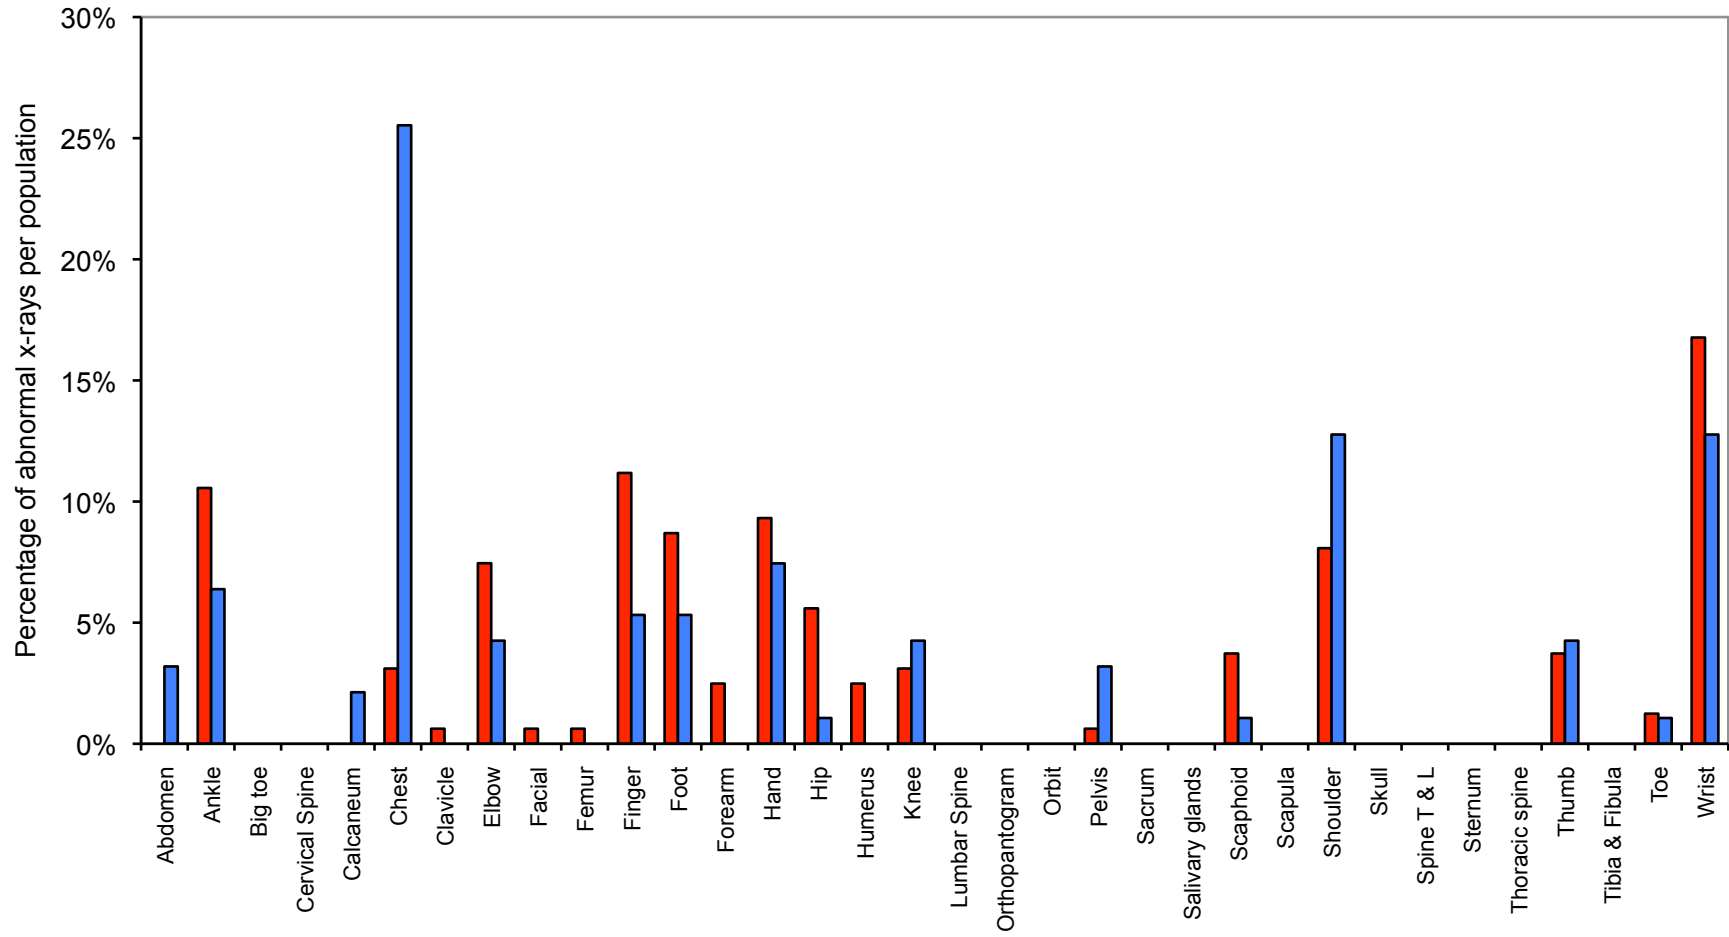

Supplement: bmjopen-2011-000746-s5.pdf [file bmjopen-2011-000746-s5.pdf]
